# Supplementary material for: Persisting fetal clonotypes influence the structure and overlap of adult human T cell receptor repertoires
Source: PubMed Central journal article supplement (PMC5500008; doi:10.1371/journal.pcbi.1005572), 2017-07-06

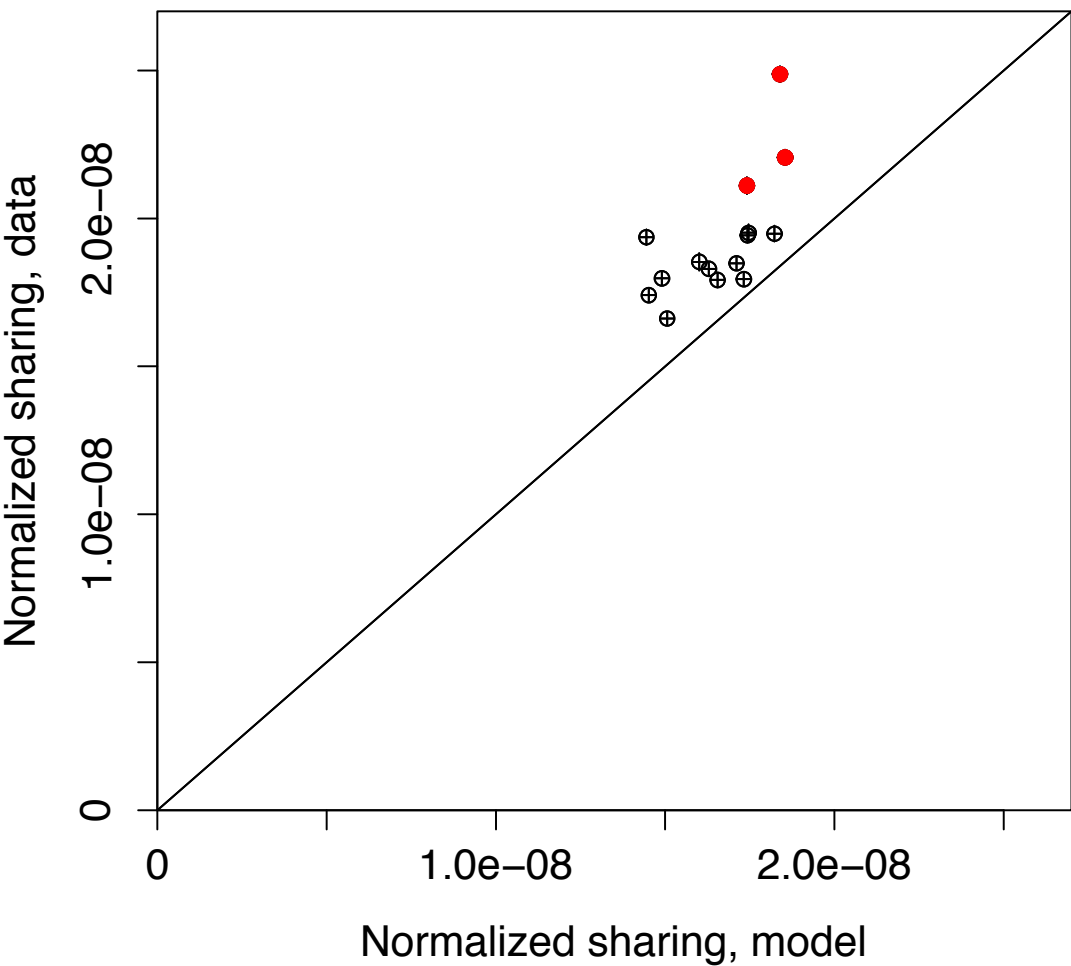

Supplement: pcbi.1005572.s005.pdf [file pcbi.1005572.s005.pdf]
