# Supplementary material for: Persisting fetal clonotypes influence the structure and overlap of adult human T cell receptor repertoires
Source: PLoS Comput Biol. 2017 Jul 6;13(7):e1005572. doi: 10.1371/journal.pcbi.1005572 (PMC5500008; doi:10.1371/journal.pcbi.1005572)
Supplement: S2 Table — (XLSX) [file pcbi.1005572.s015.xlsx]

## Sheet: Sheet1
Alpha chain
Sample_id	Number of reads	Number of UMI	Number of unique CDR3 nuc sequences
P1_CD4	6566952	430915	248457
P1_CD8	4620425	378044	162607
P1_unpart	9571058	574439	348419
P1_45RO	4099026	431529	173883
P2_CD4	4269624	941176	432476
P2_CD8	4040615	561437	204094
P2_unpart	8213565	873546	471850
P2_45RO	4608991	653326	228429
Q1_CD4	3894188	653649	277621
Q1_CD8	3201067	589757	147918
Q1_unpart	8360990	1091786	456024
Q1_45RO	3587344	687916	201218
Q2_CD4	3877893	828573	315922
Q2_CD8	3880048	825539	158954
Q2_unpart	9159719	1215155	473672
Q2_45RO	3890664	834828	224276
S1_CD4	4655514	734158	360161
S1_CD8	1009038	219433	105232
S1_unpart	3191701	621723	351923
S1_45RO	4977466	495057	189739
S2_CD4	11727155	761495	348109
S2_CD8	12436797	468345	190534
S2_unpart	11135704	610105	336177
S2_45RO	9064981	633362	228579
Beta chain
Sample_id	Number of reads	Number of UMI	Number of unique CDR3 nuc sequences
P1_CD4	3757755	759270	235040
P1_CD8	3565384	517737	204963
P1_unpart	7429601	955106	444708
P1_45RO	4036708	695379	195023
P2_CD4	3042278	449048	475545
P2_CD8	3438238	477696	241048
P2_unpart	8144134	817306	624074
P2_45RO	4598733	578663	249001
Q1_CD4	3694288	673037	386005
Q1_CD8	4586088	758201	237511
Q1_unpart	6511237	1060251	581114
Q1_45RO	3171012	664732	216879
Q2_CD4	3066472	605062	351640
Q2_CD8	3389029	691438	174552
Q2_unpart	7256515	1241753	644594
Q2_45RO	3110044	667997	214628
S1_CD4	3510759	722883	423689
S1_CD8	3162597	489393	248236
S1_unpart	7019324	1181194	673755
S1_45RO	3363725	574876	218185
S2_CD4	4034384	717023	410283
S2_CD8	4267632	546529	258832
S2_unpart	7093628	875357	521882
S2_45RO	2848644	526765	209807
Memory_aged19	7486248	424156	149292
Naïve_aged19	9166800	932396	697091
Memory_aged51	4376542	366646	104477
Naïve_aged51	4115592	602950	348005
Memory_aged57	5743372	476395	245092
Naïve_aged57	5227973	358245	422545
Cord_blood	8015355	1803557	1119000
